# Supplementary material
Source: PubMed Central journal article supplement (PMC4065652)

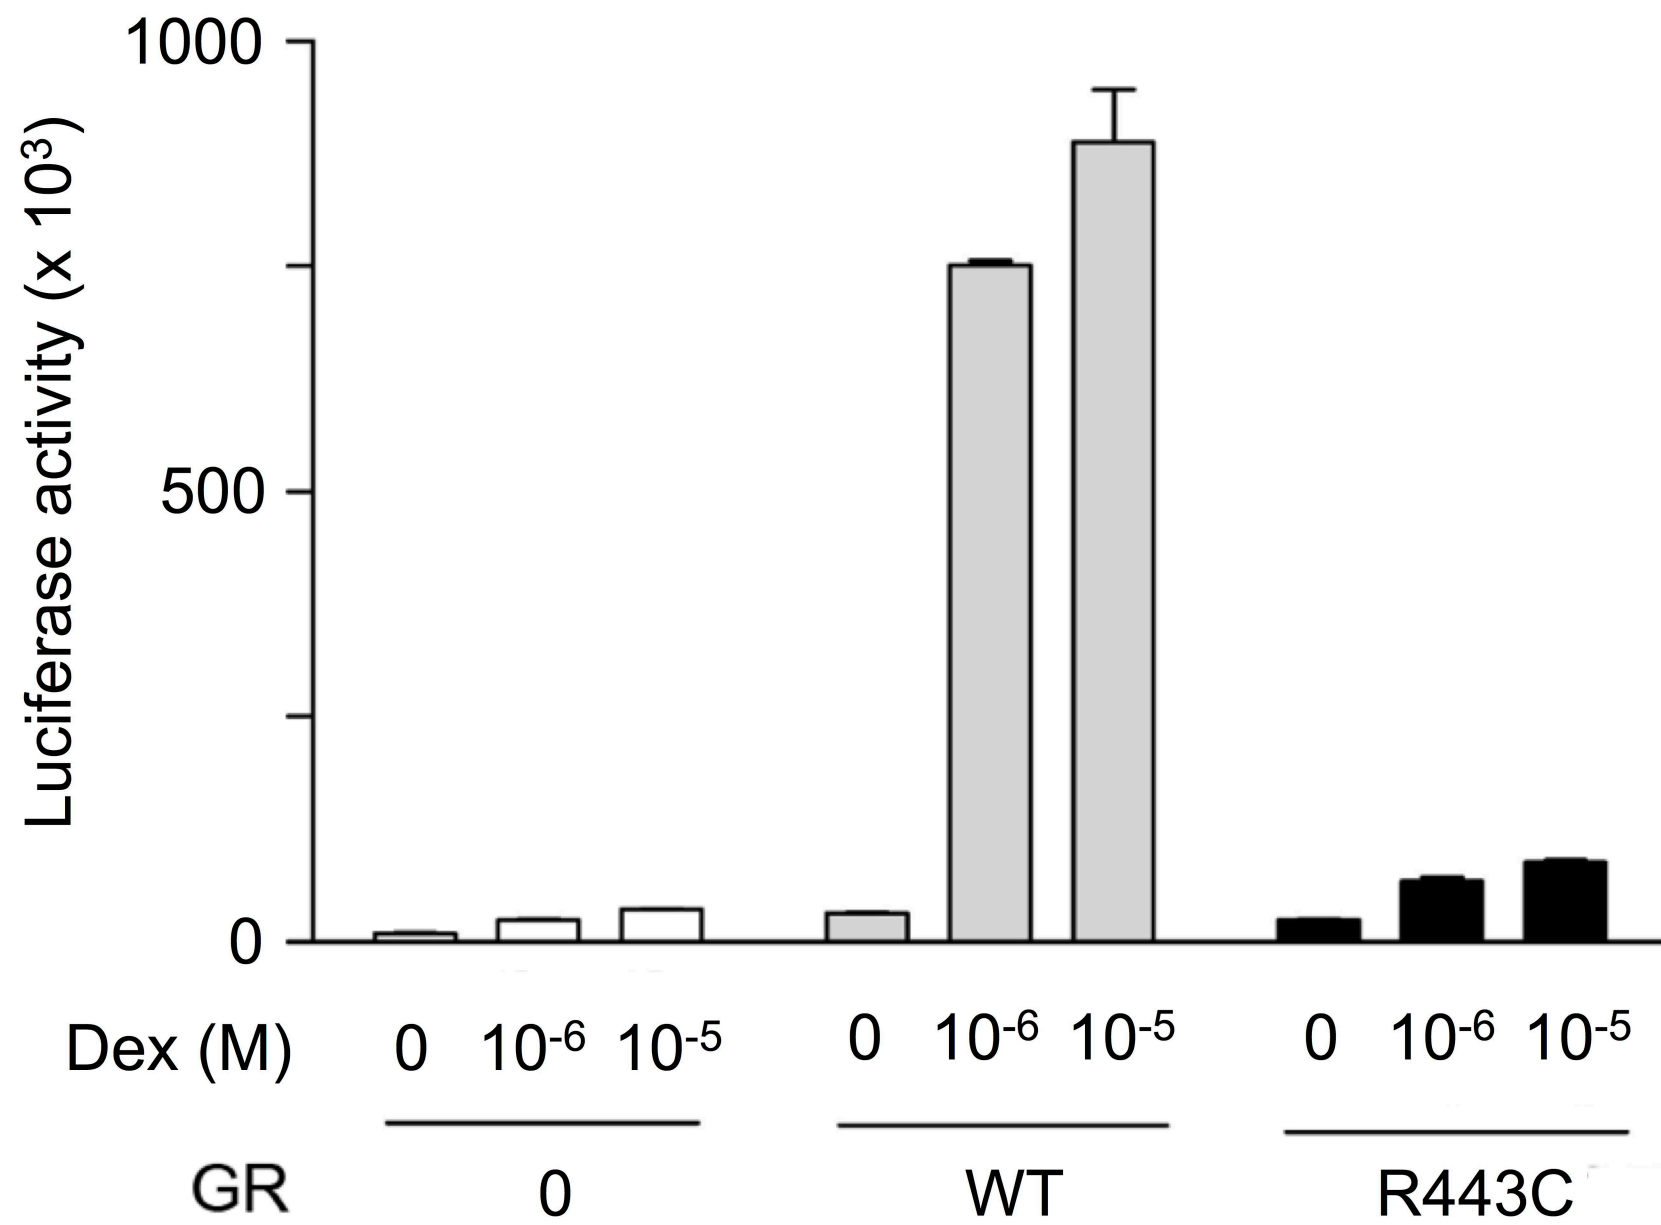

Ziv *et al.*, 2011. Fig. S1

Supplement: NIHMS368312-supplement-1.pdf [file NIHMS368312-supplement-1.pdf]

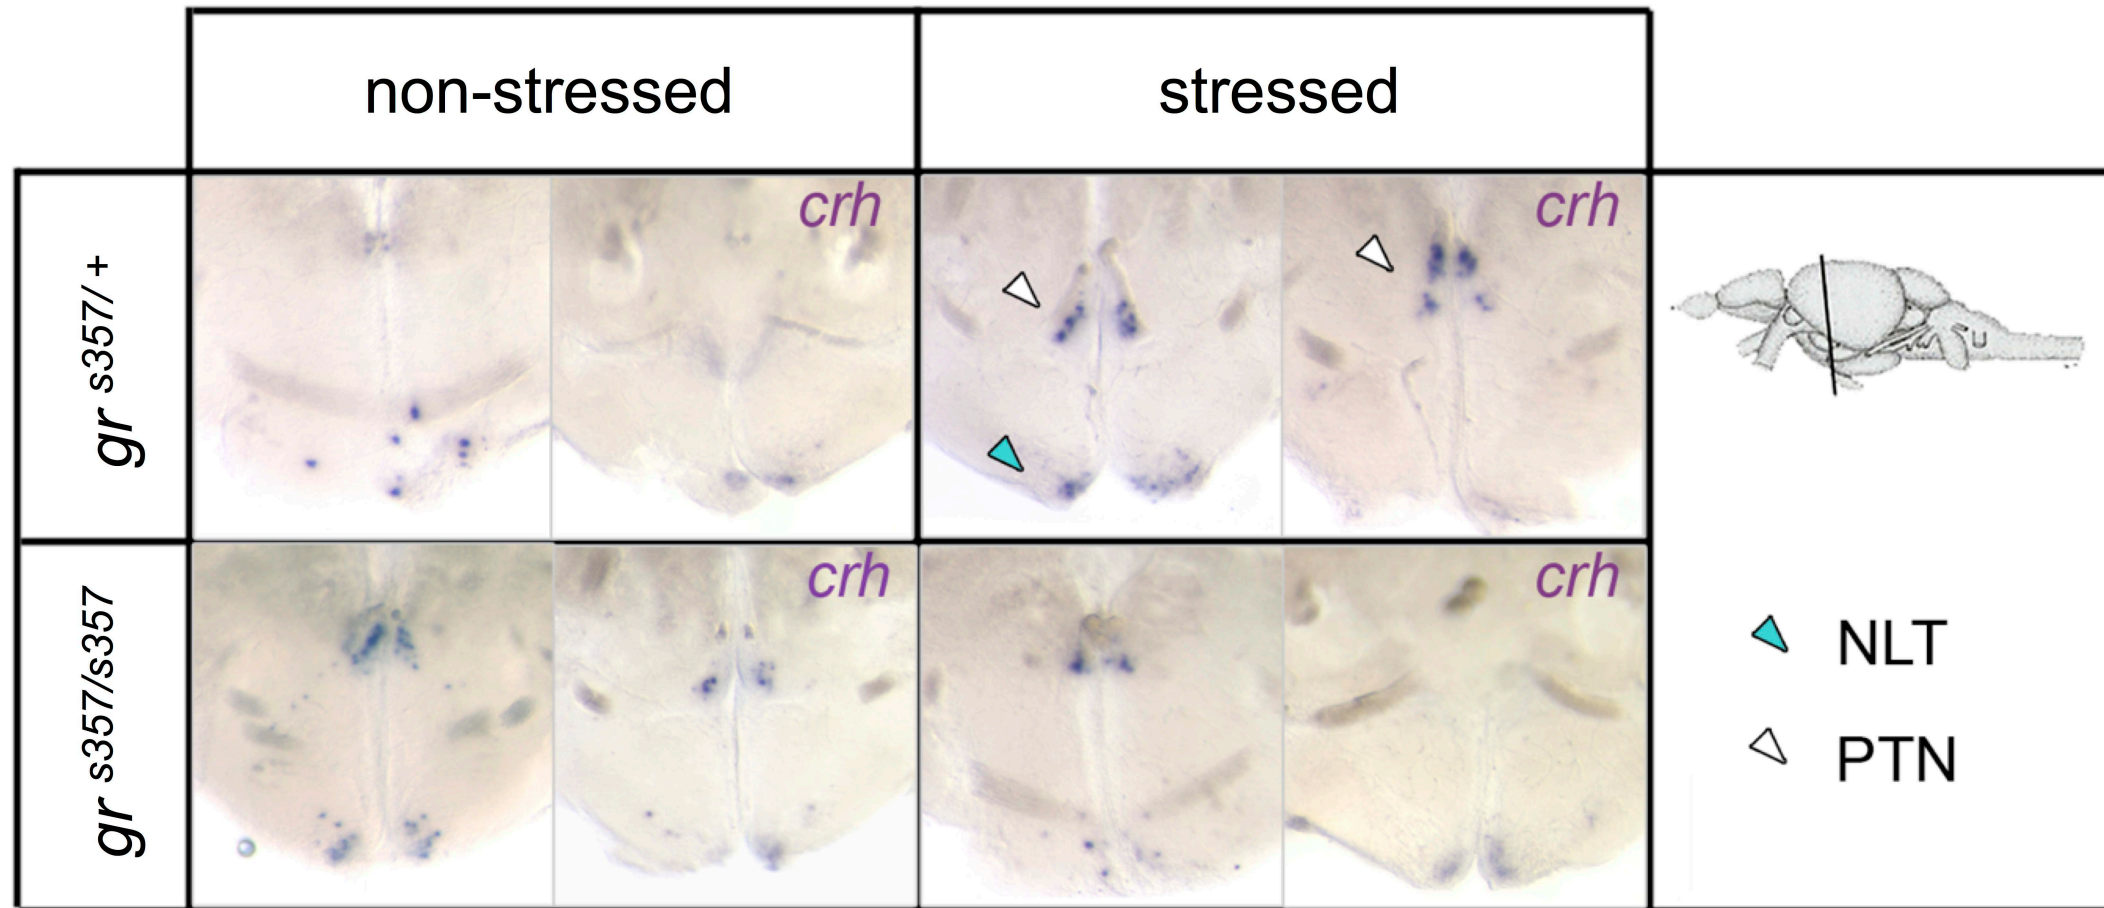

Ziv *et al.*, 2011. Fig. S2

Supplement: NIHMS368312-supplement-2.pdf [file NIHMS368312-supplement-2.pdf]

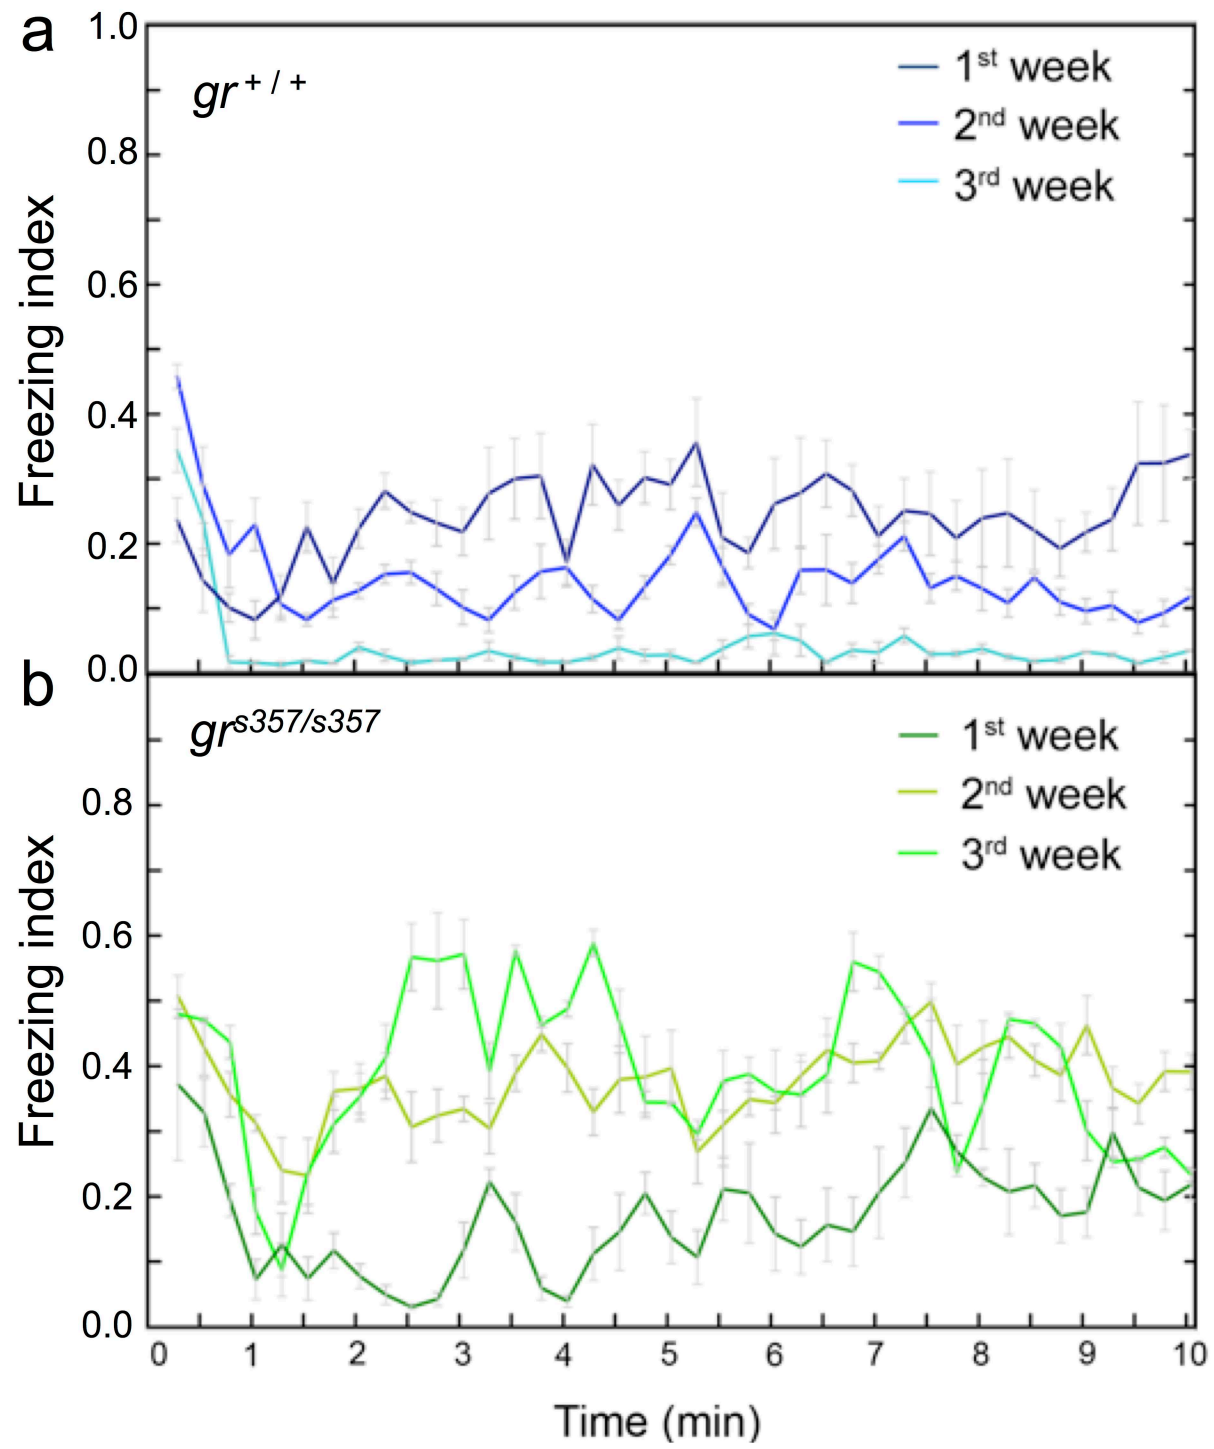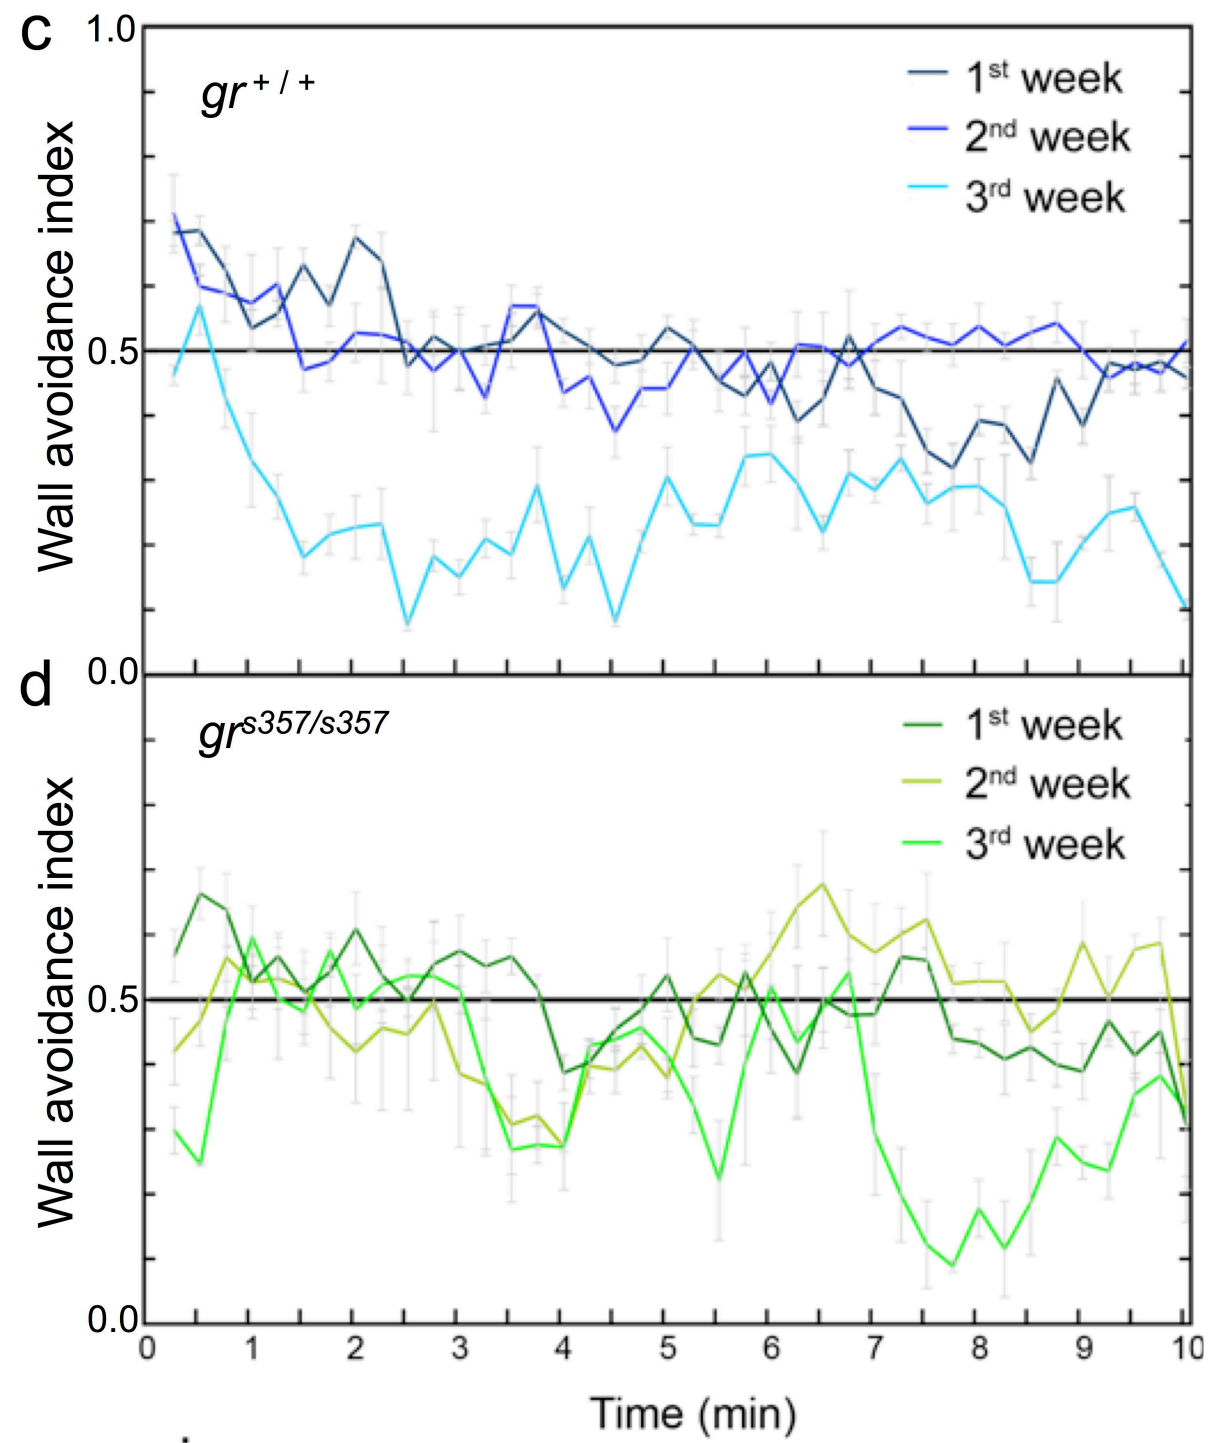

Supplement: NIHMS368312-supplement-3.pdf [file NIHMS368312-supplement-3.pdf]

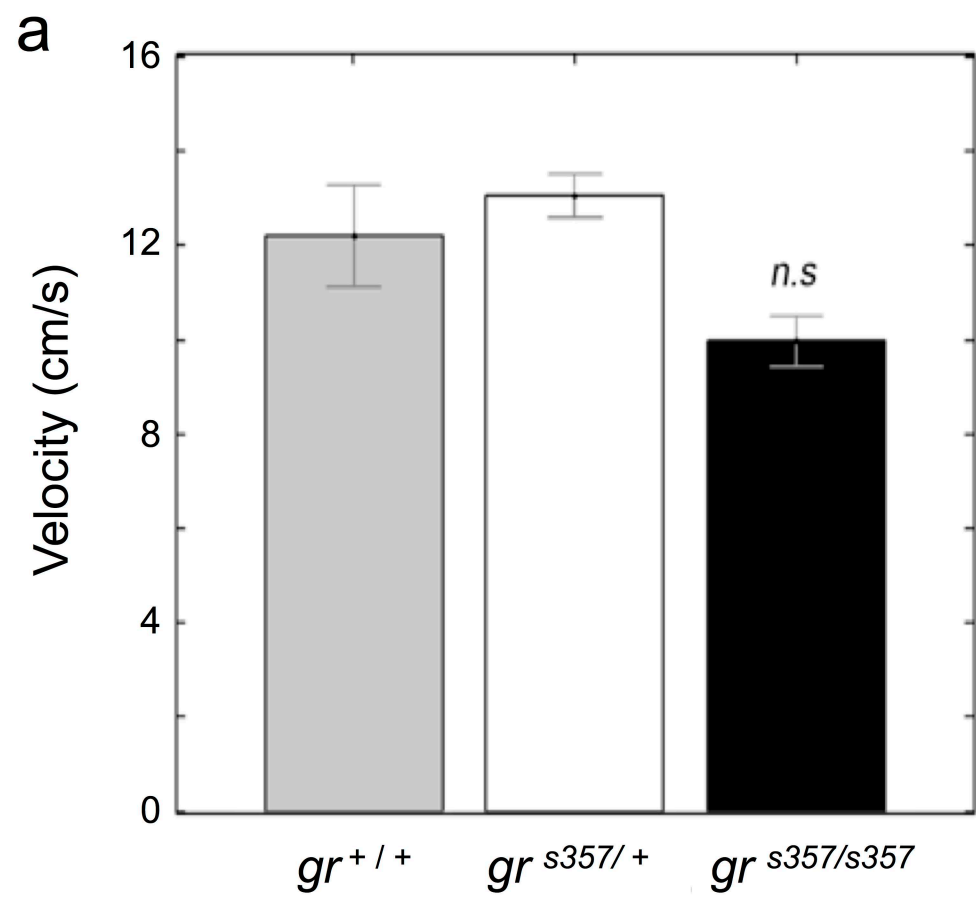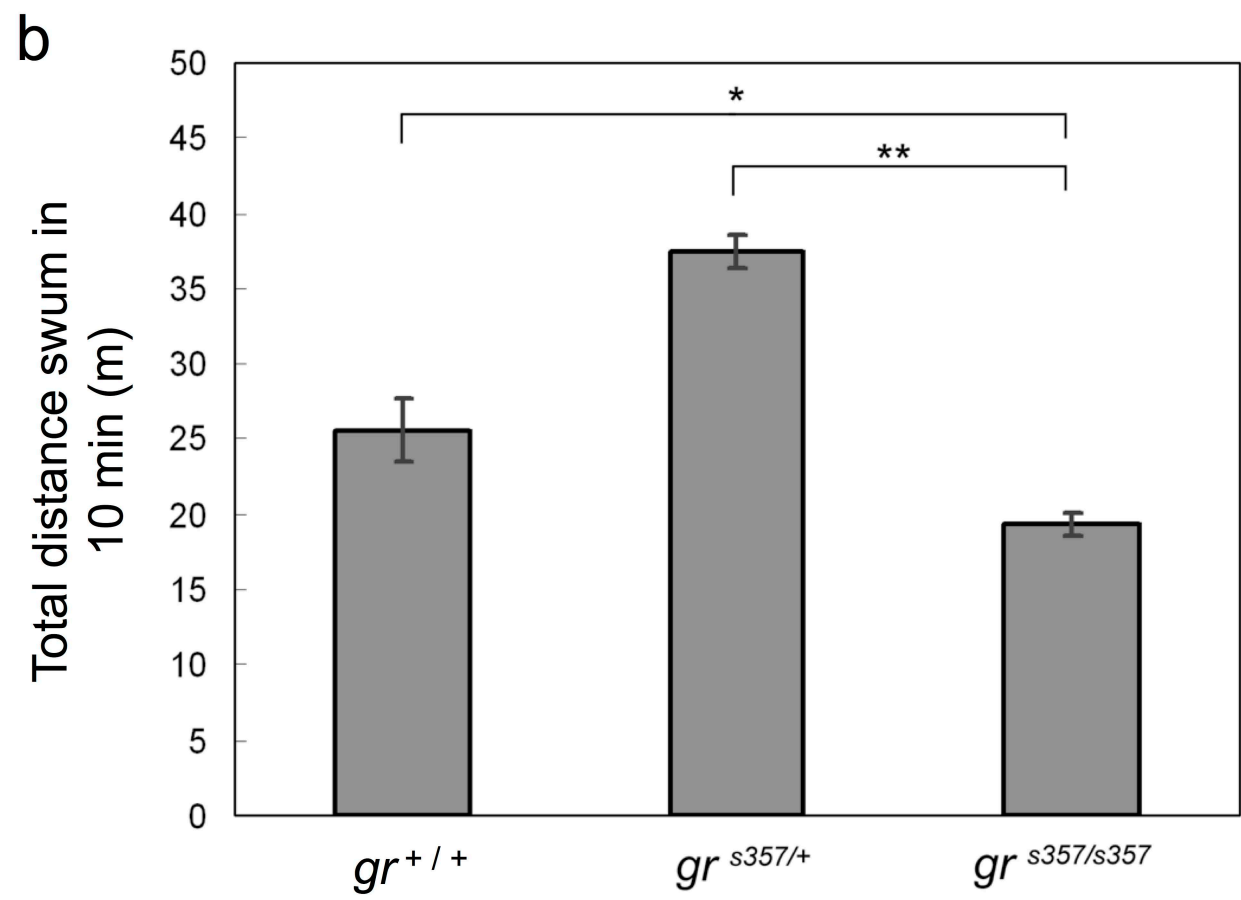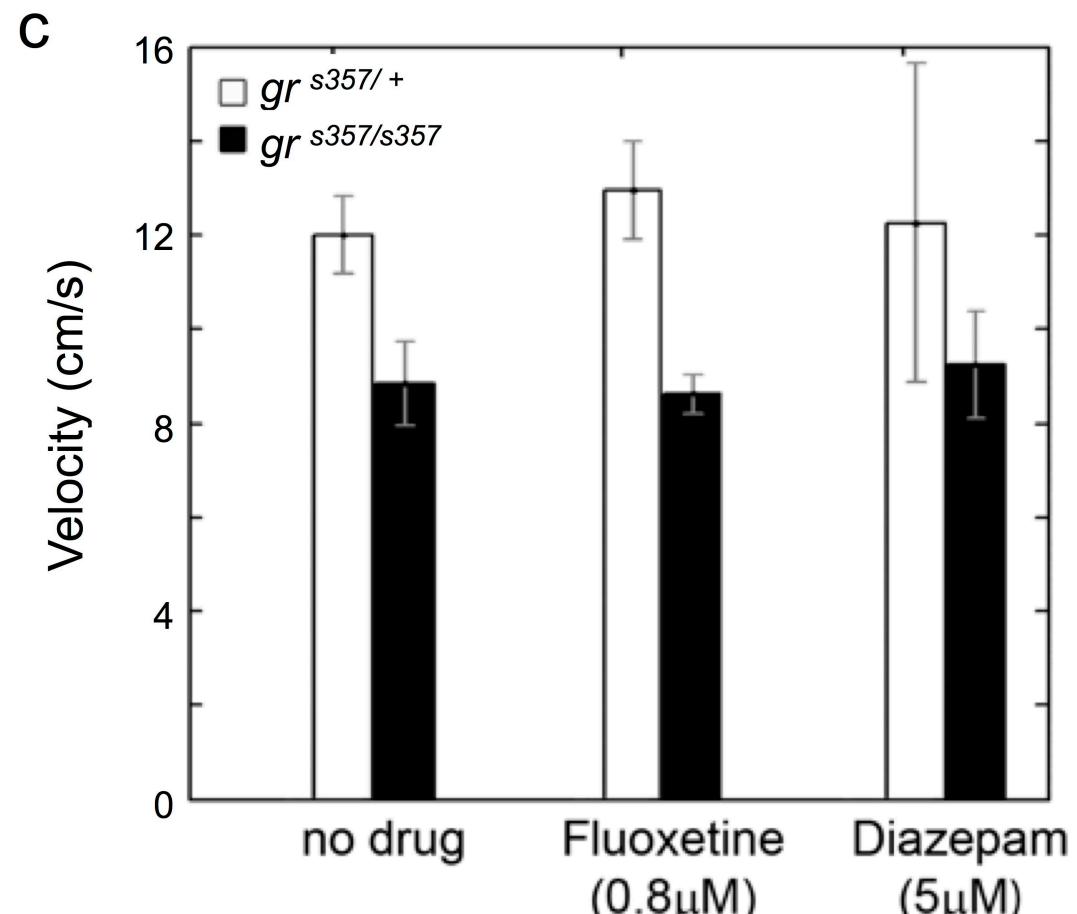

Supplement: NIHMS368312-supplement-4.pdf [file NIHMS368312-supplement-4.pdf]

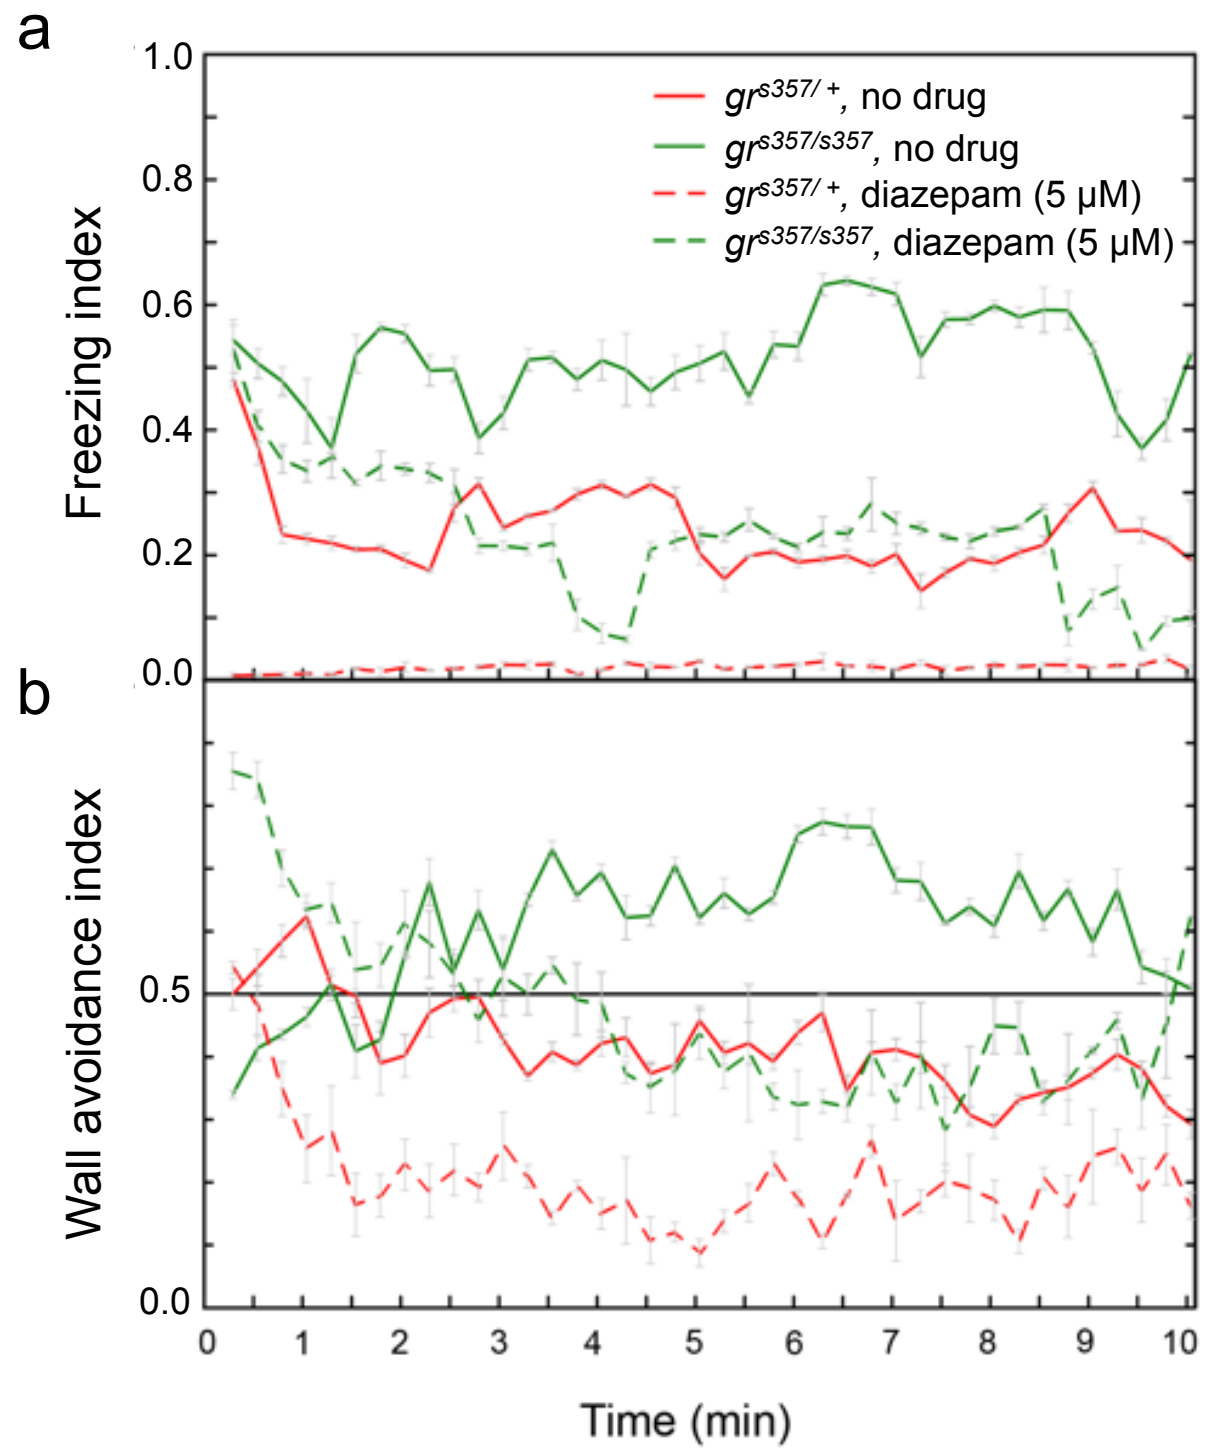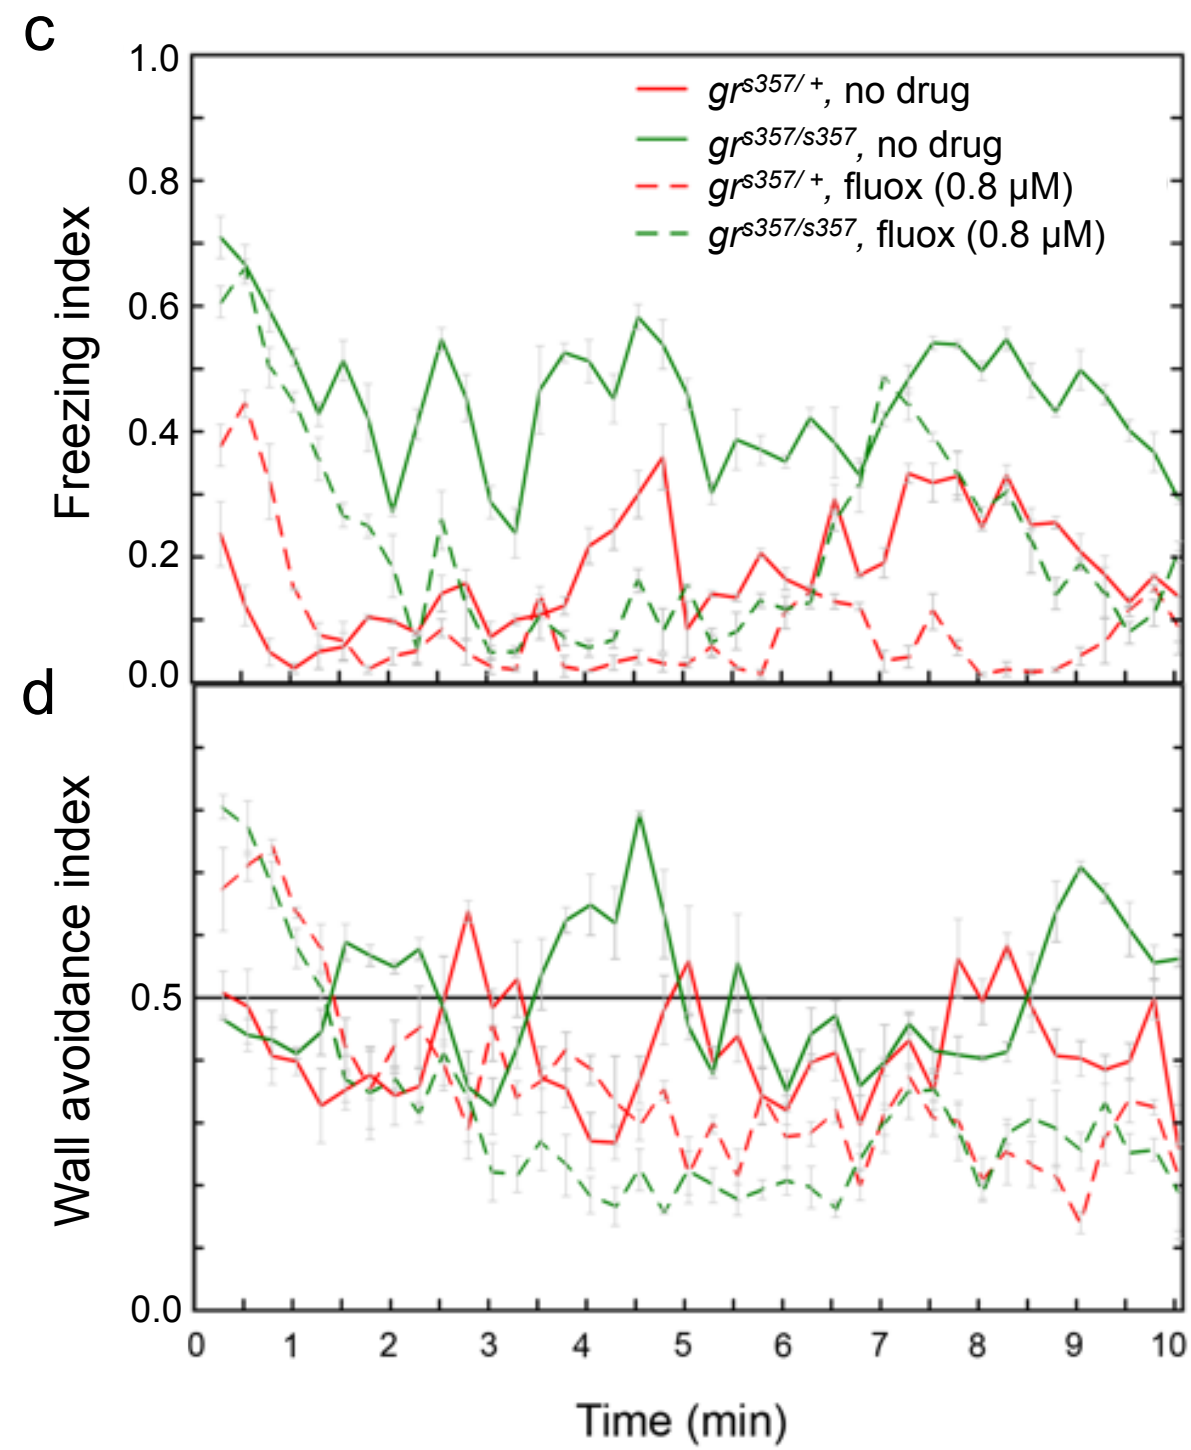

Supplement: NIHMS368312-supplement-5.pdf [file NIHMS368312-supplement-5.pdf]

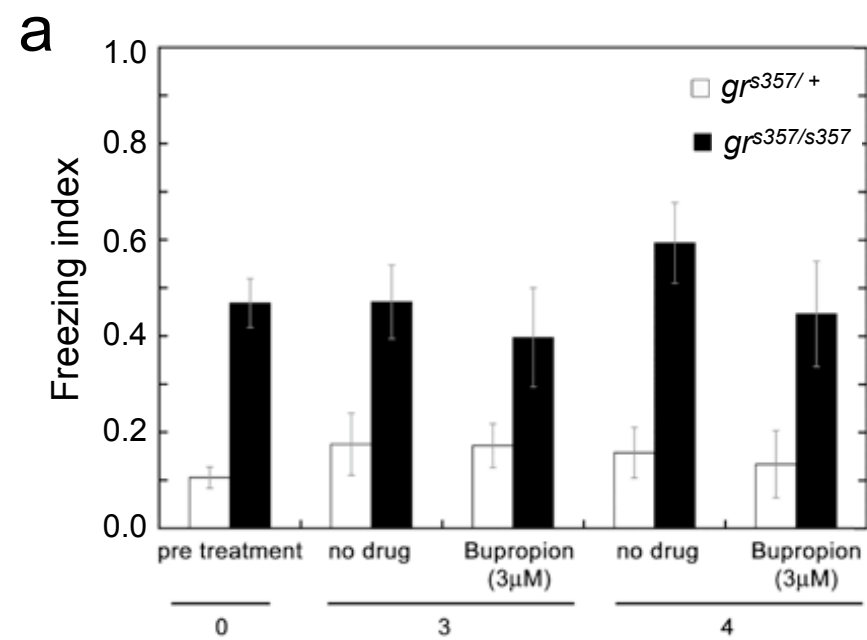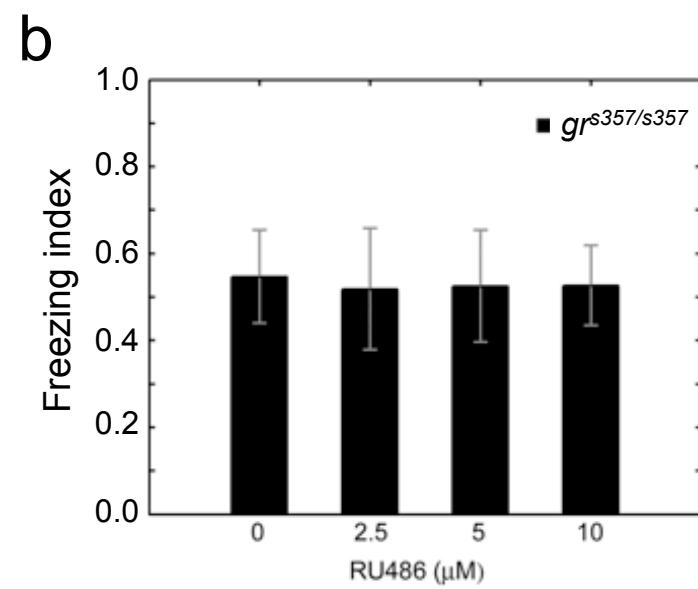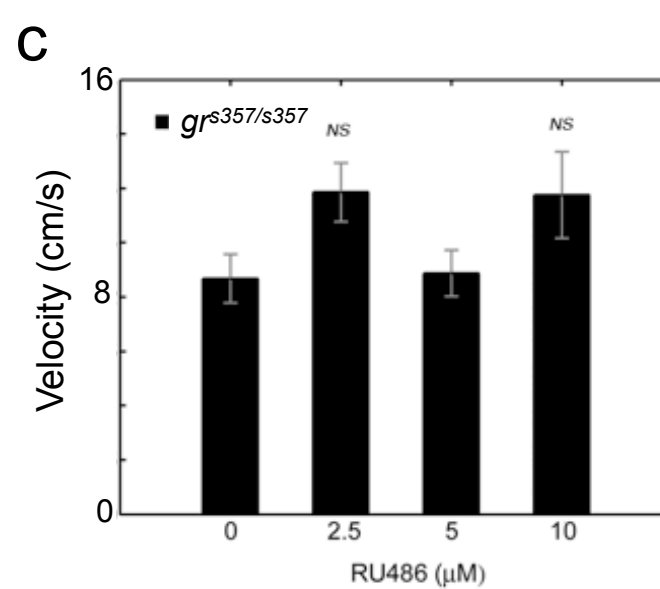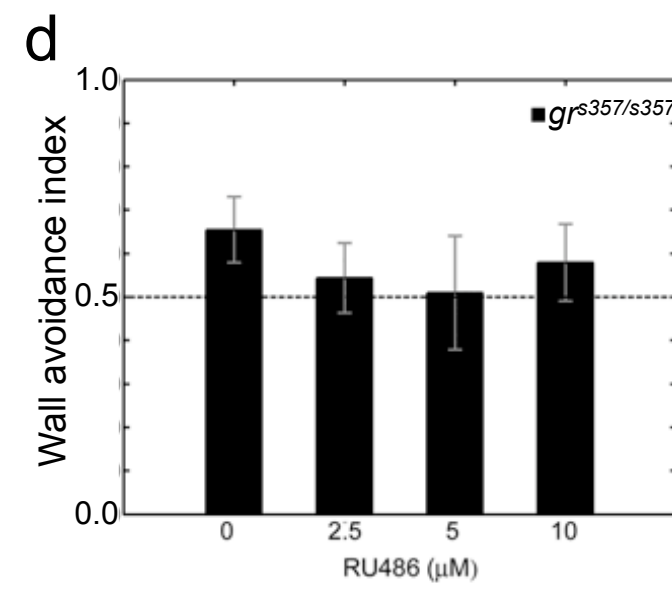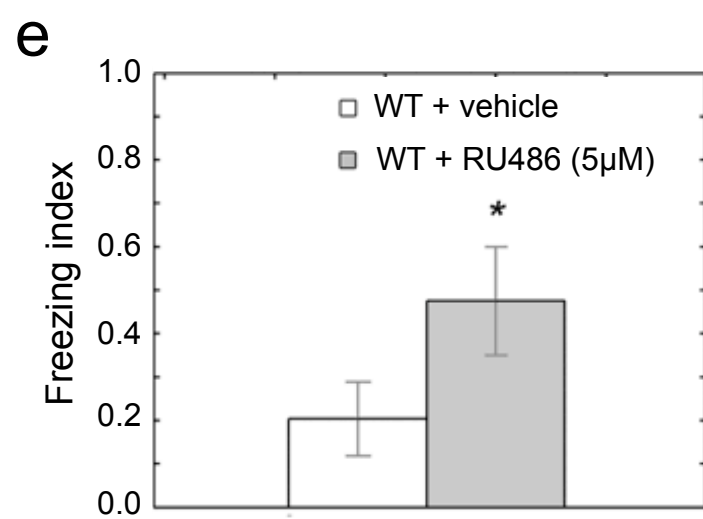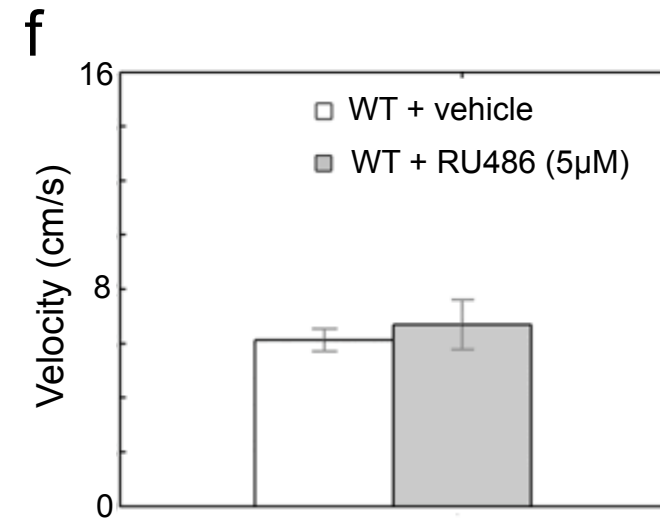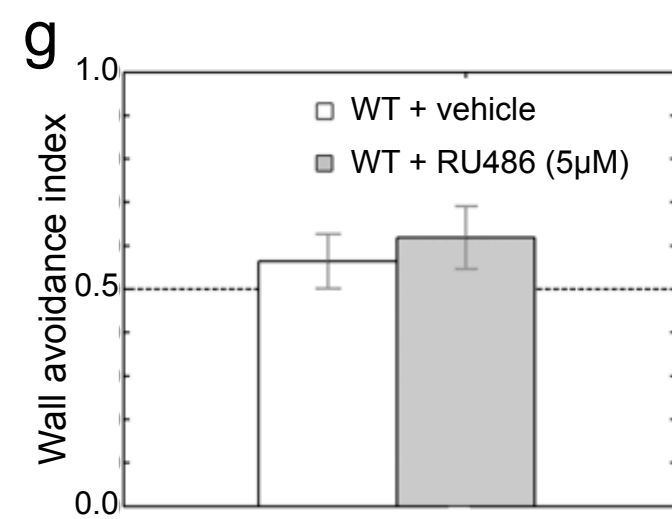

Supplement: NIHMS368312-supplement-6.pdf [file NIHMS368312-supplement-6.pdf]

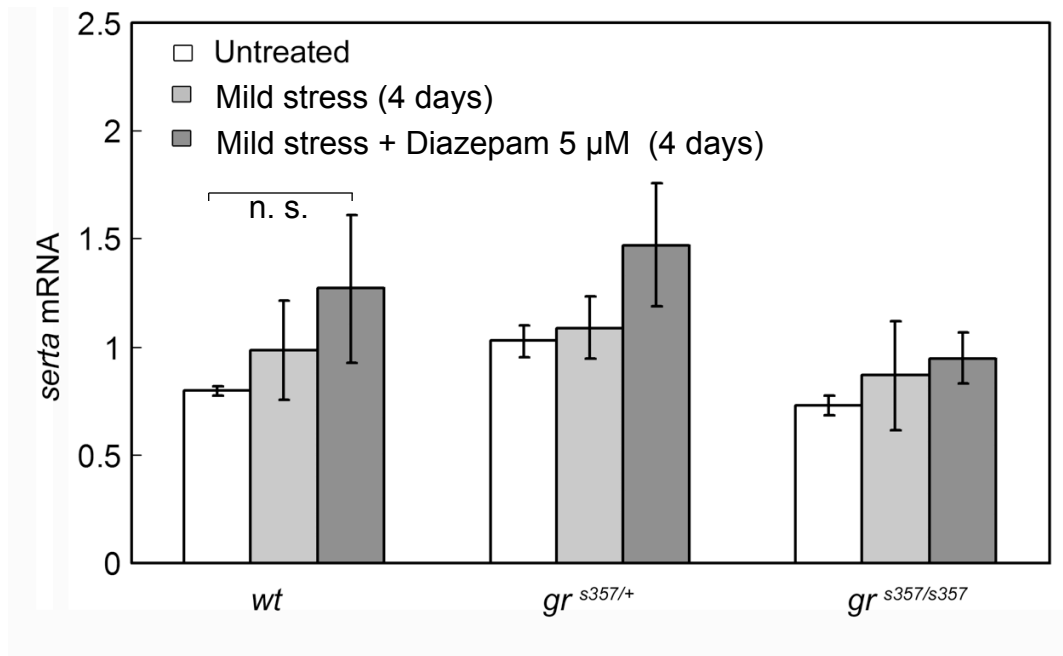

Ziv et al., Fig. S7

Supplement: NIHMS368312-supplement-7.pdf [file NIHMS368312-supplement-7.pdf]

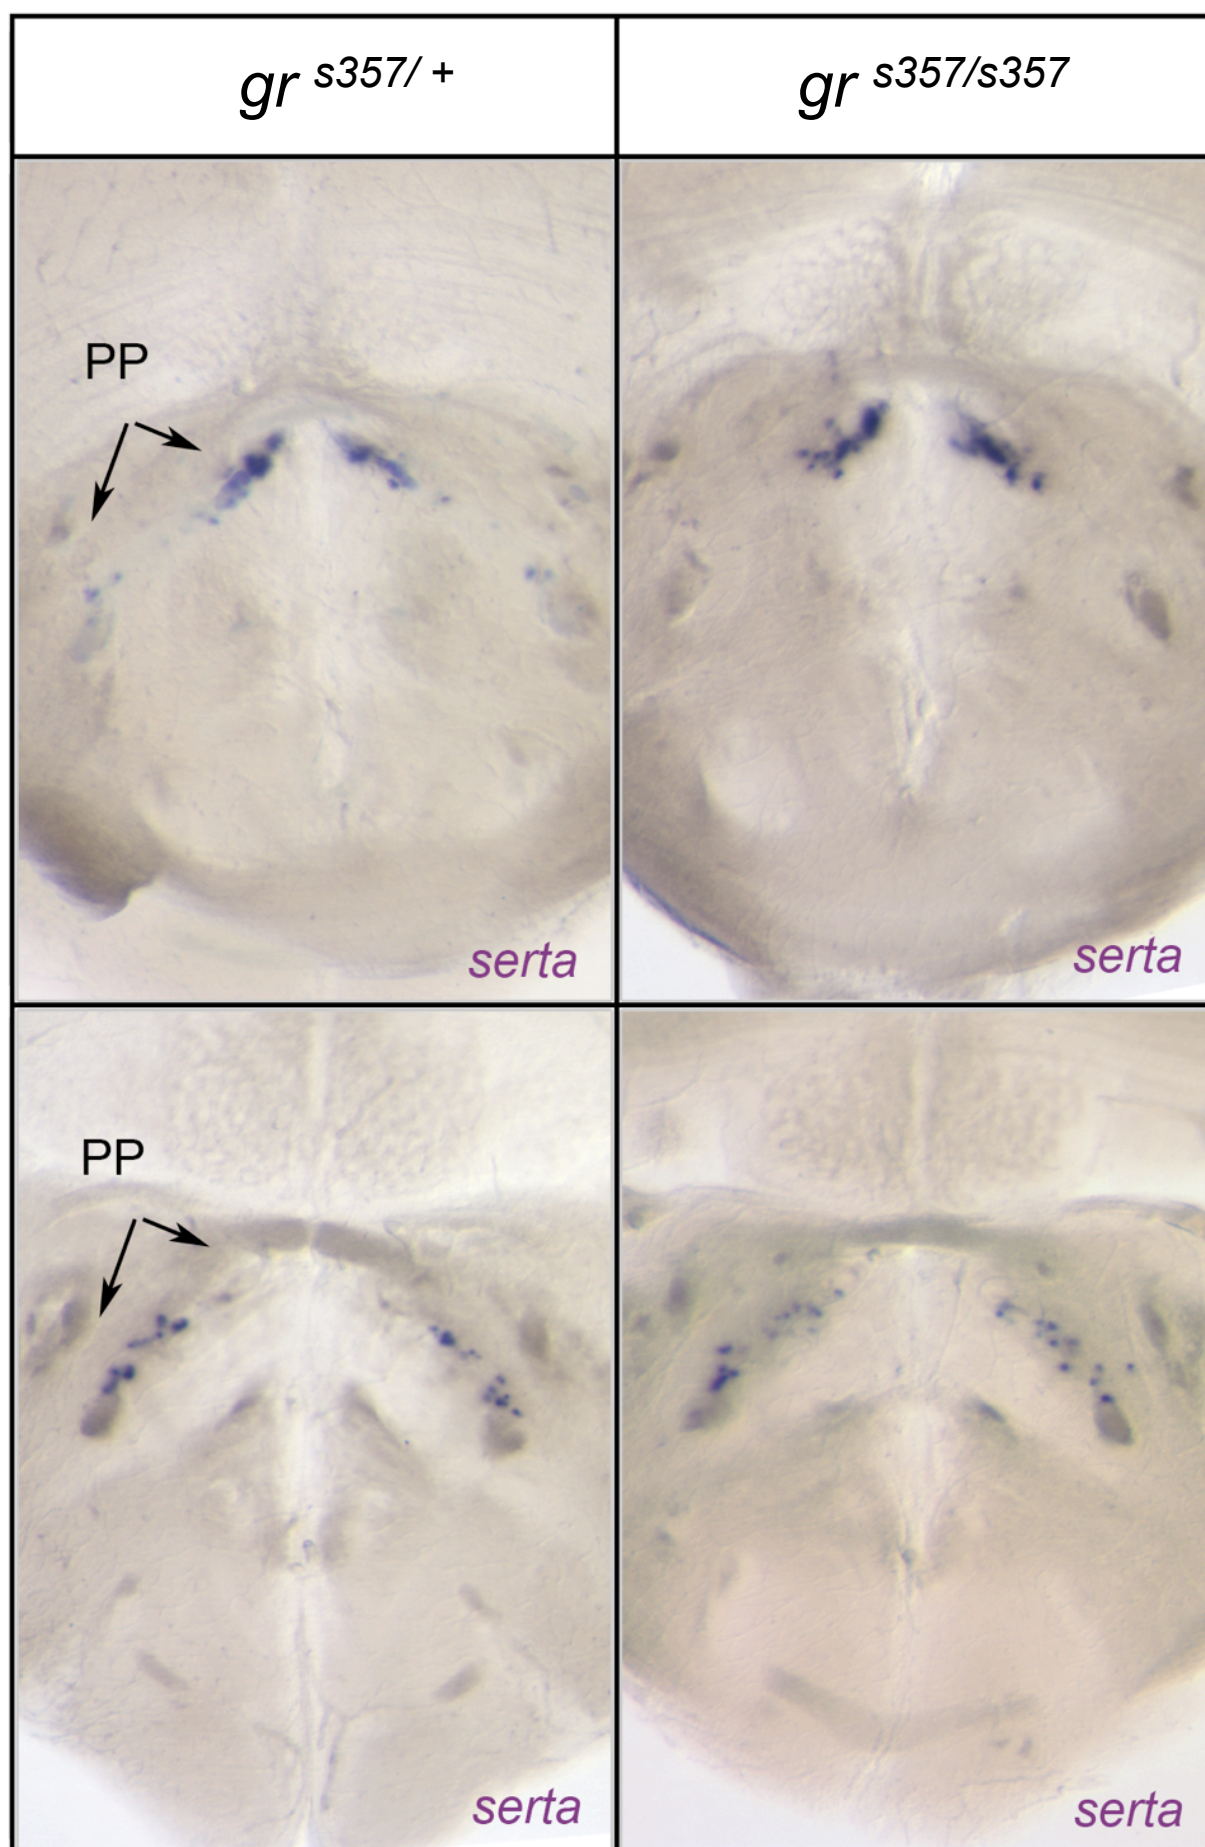

Ziv *et al.*, 2011. Fig. S8

Supplement: NIHMS368312-supplement-8.pdf [file NIHMS368312-supplement-8.pdf]
